# Supplementary material for: Elucidating the performance of data assimilation neural networks for chaotic dynamics
Source: Copernicus journal article supplement (doi:10.5194/egusphere-2026-245), 2026-01-29
Supplement: Supplementary file [file egusphere-2026-245-AC2-supplement.pdf]

Response to Referee #2, Patrick N. Raanes  
for “Elucidating the performance of data assimilation neural networks  
for chaotic dynamics”

Egusphere-2026-245

Marc Bocquet, Tobias S. Finn, Sibö Cheng, Alban Farchi

12 June 2026

*The Reviewer finds the manuscript to be of high quality, with impressive results, and recommends publication after minor changes. The comments mainly ask for clearer definitions, less circular explanations, improved notation, more explicit links to existing data-assimilation results, and greater clarity in the interpretation of the linear-in- $\zeta$  and nonlinear DANs.*

We sincerely thank the Reviewer for the careful and constructive report, and in particular for the detailed chronological comments. In the following, we discuss the raised concerns and what we have changed or revised in the manuscript. The revised manuscript and a pdf document highlighting the differences between the original and the revised manuscript will be provided.

*(1) Lines 2–5: The distinction between learning a direct mapping from forecasts and observations to increments and learning the analysis in the DAN setting was not clear.*

We agree that the distinction was not clear enough in the abstract. At the risk of a long exposition in the abstract, we are now much more explicit so as to separate the two learning paradigms. In particular DANs are now introduced as the second paradigm hopefully reducing the risk of confusing the reader.

Changed text (first part of the abstract): In supervised data assimilation machine learning emulation, the training data contain targets produced by an existing data assimilation scheme, such as analysis increments. By contrast, *data assimilation networks* were recently proposed to learn the analysis operator while they are embedded in the forecast–analysis cycle: their only targets are the true trajectory and the observations thereof. They are therefore trained to produce a stable and accurate sequential estimator, rather than to reproduce the output of a prescribed data assimilation algorithm. Conceptually more fundamental, yet computationally more challenging, such learned data assimilation scheme was shown to achieve accuracy comparable to that of the ensemble Kalman filter when applied to low-order chaotic dynamics. Strikingly, the same accuracy can be reached with a single state forecast instead of an ensemble, hence bypassing the need to explicitly represent forecast uncertainty.

*(2) Equation (5): The role of the linear form was unclear and looked circular. Does it define the expansion,  $P$ , or its computation/approximation?*

We assume that the source of confusion was in the precise definition of what  $\mathbf{P}^a$  stands for in Eq. (5), due to an unclear indeed circular wording. Equation (5) is the generic first order expansion of  $\mathbf{P}^a$  in  $\zeta$ . When compared to the theoretical Kalman update and its linearisation in  $\zeta$ , the linear operator acting on  $\zeta$  should be an analysis error covariance matrix, which can presently be attached to the analysis of DAN. We have changed the text around Eq. (5) to clarify.

Changed text: To unveil the mechanisms leveraged by the learned analysis operator to achieve this accuracy, Boc24 performed a linearisation of the operator  $\mathbf{a}_\theta$  in the projected innovation  $\zeta$ :

$$\mathbf{a}_\theta(\mathbf{x}, \zeta) \approx \mathbf{P}^a(\mathbf{x})\zeta, \quad (1)$$

where  $\mathbf{P}^a(\mathbf{x})$  is the resulting linear operator that acts on  $\zeta$ . Comparing with the linearisation of the classical Kalman update, it must coincide with the analysis error covariance matrix which could be associated by formal analogy to the learned analysis operator  $\mathbf{a}_\theta$ , hence the notation.

(3) *Line 112: The definition of  $\zeta$  should be more prominent.*

This has been corrected: we now introduce  $\zeta_k$  immediately after the DAN analysis equation and consistently refers to it as the projected innovation.

Changed text: For compactness, we define the projected innovation

$$\zeta_k \triangleq \mathbf{H}_k^\top \mathbf{R}_k^{-1} \delta_k = \mathbf{H}_k^\top \mathbf{R}_k^{-1} (\mathbf{y}_k - \mathbf{H}_k(\mathbf{x}_k^f)). \quad (2)$$

The DAN analysis operator thus receives two fields in state space,  $\mathbf{x}_k^f$  and  $\zeta_k$ .

(4) *Line 116: Replace “hence” by “implying”.*

Corrected.

(5) *Line 166:  $\Delta t$  had not yet been specified, reducing the usefulness of the stated RMSE values.*

Indeed.  $\Delta_t = 0.05$  is now part of the reference setup specification (defined a couple of paragraphs earlier).

Changed text: ... The time-step between observation batches and updates is set to  $\Delta_t = t_{k+1} - t_k = 0.05$  for all experiments with the exception of Sect. 4.1. This will be our reference DA setup.

(6) *Line 175: The assumption seems tied to quasi-linearity rather than the premises stated above, and “close to optimal” was not defined.*

We agree. We have rewritten this passage to make explicit that the statement holds under a Gaussian/quasi-linear approximation. By “close to optimal” we meant that assuming Gaussianity/quasi-linearity, the analysis is given by the MAP estimate, which is also the posterior mean in the Gaussian/linear case. The wording has been made precise.

Changed text: Under the additional Gaussian and quasi-linear assumptions used in this subsection, a *close to optimal* analysis associated with the Kalman update is the posterior mean which coincides with the maximum a posteriori of the conditional pdf, hence by the minimum of the cost function associated to the analysis.

(7) *Equation (8): Display  $x^a = x^f + P^a \zeta$  nearby and relate it to Eq. (2).*

We have followed your suggestion.

Changed text: As a consequence,  $\mathcal{J}$  is quadratic in  $\mathbf{x}$ , strictly convex, and its minimum argument is (Daley, 1991)

$$\mathbf{x}^a = \mathbf{x}^f + \left( \mathbf{H}^\top \mathbf{R}^{-1} \mathbf{H} + (\mathbf{P}^f(\mathbf{x}^f))^{-1} \right)^{-1} \mathbf{H}^\top \mathbf{R}^{-1} (\mathbf{y} - \mathbf{H} \mathbf{x}^f) \quad (3a)$$

$$= \mathbf{x}^f + \mathbf{P}^a(\mathbf{x}^f) \zeta, \quad (3b)$$

where the projected innovation  $\zeta$  has been defined by Eq. (2). Equation (3b) matches the linearisation Eq. (1).

(8) Line 185: *The conclusion of the Gaussian subsection was unclear and seemed circular.*

We have clarified that the subsection is not a proof that DAN is an EnKF. It only establishes that, under standard Gaussian/quasi-linear DA assumptions, the linearisation of a successful DAN with respect to  $\zeta$  can be interpreted as an effective Kalman-like covariance or gain. The numerical tests then assess whether this diagnostic is useful, and when it might break.

Changed text: The purpose of this derivation is to show that, under Gaussian/quasi-linear assumptions, DAN is likely to solve the optimisation problem Eq. (7), its update follows Eq. (3b), and that its derivative plays the role of an effective analysis error covariance matrix  $\mathbf{P}^a(\mathbf{x}^f)$ . Whether this local interpretation is sufficient is then tested numerically.

(9) Line 198: *The phrase “linear-in- $\zeta$ ” needed a clear definition.*

We have followed your suggestion.

Changed text: ... Details on our scalable implementation of Eq. (3b), for such a DAN linear in the projected innovations (later on called linear-in- $\zeta$  DAN), can be found in Appendix C. ...

(10) Section 3.1.3: *The theoretical arguments did not fit together clearly, and the last sentence was too strong.*

We have re-arranged and practically rewritten Sect. 3.1.3, and toned down the conclusive sentence.

Changed text: Let us focus on Sakov (2025), whose algorithmic constructions targeted at estimating  $\mathbf{P}^f(\mathbf{x}^f)$  are especially transparent and whose numerical tests were carried out in the reference setup described in Sect. 3.1. Their Algorithm A1 proceeds as follows: (i) the state  $\mathbf{x}^f$  is backtracked by  $T$  time steps; (ii) the tangent linear model, evaluated along the resulting state trajectory from  $t_{-T}$  to  $t_0$ , is applied to a matrix of state perturbations  $\varepsilon \mathbf{I}_x$ ; and (iii) the resulting perturbations at time  $t_0$  are used to estimate  $\mathbf{P}^f(\mathbf{x}^f)$ . This procedure is closely related to the Assimilation in the Unstable Space (AUS) methods (Palatella et al., 2013; Carrassi et al., 2022), since for sufficiently large  $T$  the output of the tangent linear model at  $t_0$  provides a square-root factor of the backward Lyapunov vectors. But it is already sufficient to yield a competitive analysis relying on the errors-of-the-day estimated through  $\mathbf{P}^f(\mathbf{x}^f)$  which notably relies on a single state.

Algorithm A2 of Sakov (2025) also backtracks the state  $\mathbf{x}^f$  by  $T$  time steps but differs in the subsequent step: instead of propagating perturbations, it applies a (square-root) Kalman filter to an initial covariance matrix  $\varepsilon^2 \mathbf{I}_x$  from  $t_{-T}$  to  $t_0$ , yielding a more refined estimate of  $\mathbf{P}^f(\mathbf{x}^f)$  at  $t_0$ . This yields an even more accurate DA algorithm on par with a well tuned EnKF, again relying on  $\mathbf{P}^f(\mathbf{x}^f)$  assessed from a single state.

Bocquet et al. (2017); Bocquet and Carrassi (2017) have laid the theoretical grounds to understand why these principled demonstrations are successful. Bocquet et al. (2017) focused on a degenerate Kalman filter, equivalent to an EnKF in Gaussian and quasi-linear conditions. In this setting, the covariance evolution is formally decoupled from the state update, with the important caveat that the forecast error covariance  $\mathbf{P}^f$  depends on the state  $\mathbf{x}^f$  at time  $t_0$ . Indeed, Bocquet et al. (2017) showed that, asymptotically (i.e. for large  $T$ ),  $\mathbf{P}^f$  depends on the system dynamics only through the Lyapunov vectors. By the MET, the corresponding Oseledets subspaces are measurable functions of the state  $\mathbf{x}^f$  at  $t_0$  (for almost every state on the attractor). Hence, following Bocquet et al. (2017), Algorithm A2 by Sakov (2025) can be directly interpreted as the single state-dependent covariance propagation of a degenerate Kalman filter. In the case of nonlinear dynamics, enforcing the dependence of the error covariance  $\mathbf{P}^f$  on  $\mathbf{x}^f$  is even more beneficial since the covariance evolution now explicitly depends on  $\mathbf{x}^f$ .

These theoretical results and proof experiments provide a rationale for the existence of a map  $\mathbf{x}^f \mapsto \mathbf{P}^f(\mathbf{x}^f)$  and its importance in estimating the errors-of-the-day in DA schemes based on a single forecast state  $N_e = 1$ .

(11) Lines 223 and 225: *Clarify in what sense the following analysis is a “sensitivity analysis”.*

We now define the term explicitly. We use “sensitivity analysis” in the local differential sense: we inspect Jacobians of the learned analysis increment with respect to its two inputs,  $\mathbf{x}$  and  $\boldsymbol{\zeta}$ , and use these derivatives to diagnose how a perturbation of the forecast state changes the locally inferred gain.

Changed text: ... To that end, we study the dependence of  $\nabla_{\boldsymbol{\zeta}} \mathbf{a}_{\theta}(\mathbf{x}, \boldsymbol{\zeta})|_{\boldsymbol{\zeta}=\mathbf{0}} \approx \mathbf{P}^a(\mathbf{x})$  on  $\mathbf{x}$ , i.e. the forecast state. This can be seen as a linear-in- $\boldsymbol{\zeta}$  sensitivity analysis of  $\mathbf{a}_{\theta}$  with respect to its inputs.

(12) Line 228: The term “marginal gain” was confusing; consider clarifying or renaming it.

We like the term *marginal gain*. It draws from the economics vocabulary, defined as the incremental change of a variable when one of its dependencies is changed. Following your suggestion, we clarified the meaning. We have also double-checked the related terminology in the whole manuscript and made the required adjustments.

Changed text: Since  $\boldsymbol{\Gamma}(\mathbf{x})$  is a proxy to  $\nabla_{\mathbf{x}} \mathbf{P}^a(\mathbf{x})$  as per Eq. (1),  $\boldsymbol{\Gamma}(\mathbf{x})$  can be interpreted as the *marginal* variation of  $\mathbf{P}^a(\mathbf{x})$  when the forecast state  $\mathbf{x}$  is perturbed. Under Gaussianity and linearity and assuming  $\mathbf{H}^T \mathbf{R}^{-1} = \mathbf{I}_{\mathbf{x}}$ ,  $\mathbf{P}^a(\mathbf{x})$  coincides with the Kalman gain. That is why we will call  $\boldsymbol{\Gamma}(\mathbf{x})$  the *marginal gain tensor*, or simply *marginal gain*.

(13) Equation (10): Use  $\partial$  rather than  $\nabla$  in the component-wise expression.

Isn't it what we did?

(14) Line 232: The identification with the Kalman gain needs linearity and optimally assumptions.

We agree and have added the required caveat.

Changed text: ... Under Gaussianity and linearity and assuming  $\mathbf{H}^T \mathbf{R}^{-1} = \mathbf{I}_{\mathbf{x}}$ ,  $\mathbf{P}^a(\mathbf{x})$  coincides with the Kalman gain. That is why we will call  $\boldsymbol{\Gamma}(\mathbf{x})$  the *marginal gain tensor*, or simply *marginal gain*. ...

(15) Equation (12): Add the earlier and more DA-relevant references by Raanes et al. (2019) and Stordal et al. (2016).

Done. We now cite Raanes et al. (2019) and Stordal et al. (2016), but also Fillion et al. (2020), in this discussion and retain the ML reference only for its connection with perturbation-based explanations (LIME) and SmoothGrad.

(16) Line 250: Replace “second-order moment truncation” by “Gaussian”.

Corrected.

(17) Equations (14)–(15): The notation was heavy for the approximation  $\mathbb{E}_{\boldsymbol{\zeta}}[\cdot] \simeq \cdot|_{\boldsymbol{\zeta}=\mathbf{0}}$ , and the point did not rely on Stein's lemma.

This is true. However, what matters is that the intermediate steps of Eq. (15) suggest different routes to compute the mean marginal gain. For instance,  $\mathbb{E}_{\mathbf{x} \sim \pi, \boldsymbol{\zeta} \sim \rho} [\boldsymbol{\Gamma}(\mathbf{x}, \boldsymbol{\zeta})]$  suggests to compute a double Jacobian over  $\mathbf{x}$  and  $\boldsymbol{\zeta}$ , whereas  $\mathbb{E}_{\mathbf{x} \sim \pi} [\nabla_{\mathbf{x}} \mathbb{E}_{\boldsymbol{\zeta} \sim \rho} [\nabla_{\boldsymbol{\zeta}} \mathbf{a}_{\theta}(\mathbf{x}, \boldsymbol{\zeta})]]$  suggests to compute a single Jacobian over the outcome of a regression, the latter leveraging the Stein lemma. There is actually an interesting third route which uses an additional Stein lemma over the  $\mathbf{x}$  variable, which we

successfully implemented and tested, but which may be too much for this paper. We have added a small paragraph to clarify and account for your remark.

Changed text: Note that Eq. (15) is a simple point estimator, which formalises that the averaged Jacobian  $\mathbb{E}_{\zeta}[\nabla_{\zeta} \mathbf{a}_{\theta}(\mathbf{x}, \zeta)]$  is well approximated by  $\nabla_{\zeta} \mathbf{a}_{\theta}(\mathbf{x}, \zeta)|_{\zeta=0}$  when the distribution of projected innovations is concentrated near zero. The Stein lemma, which provides a regression-based estimator of this average, is not required per se to ascertain Eq. (15), but offers an alternative expression which we leverage in Appendix H.

(18) Line 270: *The induced observation-space symmetry group should be isomorphic to  $G$ , making the assumption superfluous.*

The reference to the appendix where the equivariance is proven pointed to the wrong appendix in the original manuscript. This has been corrected. We have removed the sentence where the induced symmetry is mentioned. Moreover, we have substantially revised the beginning of the appendix (now Appendix F), to clarify the concepts, at the risk of being a bit formal.

Changed text (in the introduction of the appendix): We wish to prove the equivariance of the marginal gain tensor, i.e. that for all  $\mathbf{x}$  and  $\zeta$ ,  $\Gamma(g \circ \mathbf{x}, g \circ \zeta) = g \otimes g^{\top} \otimes g^{\top} \circ \Gamma(\mathbf{x}, \zeta)$ , under the action of an isometry  $g \in \mathcal{G}$ . The action of  $g$  on either state vector  $\mathbf{x}$  or  $\zeta$  is represented by an orthogonal matrix  $\mathbf{G}$ :  $g \circ \mathbf{x} = \mathbf{G}\mathbf{x}$ ,  $g \circ \zeta = \mathbf{G}\zeta$ .

We say that  $g$  preserves the fibres (preimages) of  $\mathcal{H}_k$  if, for all  $\mathbf{x}, \mathbf{x}'$  such that  $\mathcal{H}_k(\mathbf{x}) = \mathcal{H}_k(\mathbf{x}')$  one has  $\mathcal{H}_k(g \circ \mathbf{x}) = \mathcal{H}_k(g \circ \mathbf{x}')$ . An isometry  $g_y$  defined over the observation space of  $\mathcal{H}_k$  can then be associated to such  $g$  through  $g_y \circ \mathcal{H}_k(g^{\top} \circ (\cdot)) = \mathcal{H}_k(\cdot)$ . The action of such induced isometry  $g_y$  is represented by the orthogonal matrix  $\mathbf{G}_y$ :  $g_y \circ \mathbf{y} = \mathbf{G}_y \mathbf{y}$ . Because  $\mathbf{G}$  and  $\mathbf{G}_y$  are orthogonal, one has  $\mathbf{G}^{-1} = \mathbf{G}^{\top}$  and  $\mathbf{G}_y^{-1} = \mathbf{G}_y^{\top}$ .

With these definitions in hand, we consider a maximal group of isometries  $\mathcal{G}$  defined over the state space such that

- $\mathcal{G}$  preserves the fibres of all  $\mathcal{H}_k$ , inducing a group of isometries  $\mathcal{G}_y$  (possibly for each  $k$ ).  $\mathcal{G}_y$  is isomorphic to  $\mathcal{G}$ ,
- the associated  $\mathcal{G}_y$  satisfies  $\mathbf{G}_y \mathbf{R}_k \mathbf{G}_y^{\top} = \mathbf{R}_k$ , which accounts for any heteroscedasticity of the observation error statistics,
- $\mathcal{G}$  commutes with the autonomous dynamics, i.e.  $\mathbf{G}\mathcal{M}(\mathbf{G}^{\top}(\cdot)) = \mathcal{M}(\cdot)$ .

A consequence of the equivariance with respect to  $\mathcal{H}_k$ , i.e.  $\mathbf{G}_y \mathcal{H}_k(\mathbf{G}^{\top}(\cdot)) = \mathcal{H}_k(\cdot)$ , is  $\mathbf{G}_y \mathbf{H}_k \mathbf{G}^{\top} = \mathbf{H}_k$ , readily obtained by differentiation.

(19) Section 3.2.2: *Provide a less group-theoretical summary, perhaps explaining the construction as a circulant average.*

We have followed your suggestion. The beginning of the section has been revised.

Changed text: An important way to reduce the computational cost and complexity of interpreting the mean marginal gain  $\tilde{\mathbf{\Gamma}}$  is to exploit the symmetries of the DA problem, when applicable. If the model variables are observed homogeneously and homoscedastically, then the probability laws defining the DA problem are invariant under these symmetries, and the corresponding analysis operator is equivariant. As a result, the components of  $\tilde{\mathbf{\Gamma}}$  related by symmetry are redundant, so that its interpretation can be restricted to a reduced set of representative components.

For instance, in the one-dimensional periodic L96 model with homogeneous and homoscedastic observations, a cyclic translation of the state variables induces the same cyclic translation of the observations, innovations, and analysis increments. The probability laws defining the DA problem are therefore invariant under the translation group, while the corresponding analysis operator is equivariant. Consequently, if the trained DAN preserves this symmetry, any trajectory-averaged sensitivity tensor must have a circulant structure: the information associated with different grid points is identical up to a cyclic shift. The group-theoretical argument below provides a formal justification for this circulant averaging.

(20) Equation (21): The notation made it hard to see why the result is a two-index object; the role of  $r$  was unclear.

We have changed the notation to make  $r$  explicitly fixed. The object  $\overline{\Omega}^{(r)}$  is now introduced as a matrix slice of the averaged 3-tensor with its third index fixed at the reference site  $r$ . We have also significantly reduced the usage of the bracket notation around tensors, throughout the manuscript.

Changed text: Leveraging the equivariance induced by the translational invariance of the L96 model, for a fixed reference site  $r$ , we define the *slice* matrix  $\overline{\Omega}^{(r)} \in \mathbb{R}^{N_x \times N_x}$  component-wise by

$$\overline{\Omega}_{ij}^{(r)} \triangleq \overline{\Gamma}_{ijr}. \quad (4)$$

The index  $r$  is not an additional free index of  $\overline{\Omega}^{(r)}$ ; it labels the chosen slice of the averaged 3-tensor.

(21) Line 343: The omission of the IEnKS was disappointing; existing benchmarks should at least be referenced.

The absence of the IEnKS is deliberate. How we explained this omission was actually sloppy and did not provide the more fundamental reasons why we chose to do so. This is now explained.

Changed text: The iterative ensemble Kalman smoother (Bocquet and Sakov, 2014; Raanes et al., 2019) has the potential to outperform those benchmarks, including for filtering metrics. However, it works over longer DA windows, as opposed to the DAN implemented here, so that such comparison would be biased. Actually, we have developed variants of DAN that work on extended DA windows similarly to the IEnKS, but reporting on them is beyond the goals of this paper.

(22) Line 366: Replace “passed” by “beyond”.

Corrected.

(23) Figure 4 caption: Replace  $N$  by  $N_{\text{iter}}$ .

$N_{\text{iter}}$  does appear when using the original pdf and using any pdf viewer we have access to. We have checked that all the required fonts are embedded in both the standalone figure and in the original manuscript pdf. Hence, the missing “iter” seems to be due to Copernicus’ processing of the figures.

(24) Line 459: The claim that the DAN must learn the map  $\mathbf{x}^f \mapsto \mathbf{P}^f(\mathbf{x}^f)$  was too strong in view of the poor performance of the linear-in- $\zeta$  DAN in nonlinear regimes.

We agree and have softened the conclusion. The linear-in- $\zeta$  DAN indicates that the map  $x^f \mapsto P^f(x^f)$  is sufficient in the mild nonlinear regime, but Fig. 3 shows that it is not sufficient in stronger nonlinear regimes. The full DAN must therefore encode flow-dependent uncertainty information and nonlinear/non-Gaussian corrections, but it need not explicitly compute a covariance matrix.

Changed text: We have previously shown that, to achieve this level of performance, DAN must implicitly learn a map  $\mathbf{x}^f \mapsto \mathbf{P}^a(\mathbf{x}^f)$ , at least in the mildly nonlinear regime. Its existence is supported by a multiplicative ergodic theorem applied to the entire DA process viewed as a dynamical system.

(25) Unsorted: “Expansion” is confusing if the operation is a first-order regression; consider “linearisation”.

We agree and have replaced “expansion” by “linearisation” wherever the intended meaning is a first-order local or regression-based approximation.

*(26) Unsorted: The code should be available to the reviewers.*

We preferred to submit this manuscript to *Nonlinear Processes in Geosciences* where the focus is on the methods, rather than to *Geoscientific Model Development* where the focus is on the implementation. However, upon acceptance, the core codes will be made public through a versioned repository with a persistent identifier.

*(27) Unsorted: Add a dedicated comment on the performance of the linear-in- $\zeta$  DAN and the DAN with linear activation functions.*

With linear activation functions only, DAN is essentially an affine map of its inputs and cannot build a rich state-dependent prior; its behaviour is therefore close to that of a static background method. The linear-in- $\zeta$  DAN is more expressive because  $\mathbf{P}_\theta^a(\mathbf{x})$  depends nonlinearly on the forecast state, and it succeeds in the mild regime. Its degradation as  $\Delta_t$  increases shows that a covariance-like dependence on  $\mathbf{x}$  is not enough: the full DAN also uses nonlinear dependence on  $\zeta$  to represent non-Gaussian corrections.

A similar comment for the linear activation functions is actually already present in Sect. 4.1. And the subsection Sect. 4.3.1 is later dedicated to the performance and interpretation of the linear-in- $\zeta$  DAN. It is not included in the discussion of the numerical results because it is not used as a benchmark but as a demonstration tool.

*(28) Unsorted: Add a comment relating to moment closure in linear dynamics and why introducing covariance dependence on the state can be fruitful in nonlinear dynamics.*

We believe you are referring to the discussion of Sect. 3.1.3, *On the importance of the  $\mathbf{x}^f \mapsto \mathbf{P}^f(\mathbf{x}^f)$  map*. We agree with you that in the nonlinear dynamics case, enforcing the dependence of the error covariances on the state should be systematically helpful since the tangent linear model now depends on the state. However, even in the linear non-autonomous dynamics case, one expects the error covariance matrices to asymptotically collapse onto the unstable subspace which is time-dependent. This subspace can in theory be inferred from the state if the MET is applicable. Hence, nonlinearity is likely not the only reason why the dependence of the error covariances on the state is fruitful. Thank you for pointing it out and the suggestion. We have added a sentence in Sect. 3.1.3.

Changed text: *In the case of nonlinear dynamics, enforcing the dependence of the error covariance  $\mathbf{P}^f$  on  $\mathbf{x}^f$  is even more beneficial since the covariance evolution now explicitly depends on  $\mathbf{x}^f$ .*

*(29) Unsorted: Have the authors investigated benefits of operating DANs based on ensemble forecasts?*

In Boc24, we tested ensemble variants of DANs and found no clear point-estimation accuracy gain in the L96 settings considered there once the single-state DAN was sufficiently trained. This solution was concomitant to a *feature collapse* of the neural network. We pointed out however, that a better solution with an explicit dependence on the ensemble was likely but would probably not yield a significantly better accuracy, since the single-state DAN is already on par with a well-tuned EnKF.

Differently, what we could test in the future would be based on a single-state trained DAN, to generate an analysis ensemble from  $\mathbf{a}_\theta$  (similarly to how we generate perturbations in the regression of  $\mathbf{a}_\theta$  to a Kalman gain matrix), and forecast it to generate an ensemble forecast. This might yield an accuracy improvement due to the ensemble forecasts, in place of single-state forecasts, when the dynamics are significantly nonlinear.

## References

- Bocquet, M. and Carrassi, A.: Four-dimensional ensemble variational data assimilation and the unstable subspace, *Tellus A*, 69, 1304–504, <https://doi.org/10.1080/16000870.2017.1304504>, 2017.
- Bocquet, M. and Sakov, P.: An iterative ensemble Kalman smoother, *Q. J. R. Meteorol. Soc.*, 140, 1521–1535, <https://doi.org/10.1002/qj.2236>, 2014.
- Bocquet, M., Gurumoorthy, K. S., Apte, A., Carrassi, A., Grudzien, C., and Jones, C. K. R. T.: Degenerate Kalman filter error covariances and their convergence onto the unstable subspace, *SIAM/ASA J. Uncertain. Quantif.*, 5, 304–333, <https://doi.org/10.1137/16M1068712>, 2017.
- Bocquet, M., Farchi, A., Finn, T. S., Durand, C., Cheng, S., Chen, Y., Pasmans, I., and Carrassi, A.: Accurate deep learning-based filtering for chaotic dynamics by identifying instabilities without an ensemble, *Chaos*, 29, 091 104, <https://doi.org/10.1063/5.0230837>, 2024.
- Carrassi, A., Bocquet, M., Demaeyer, J., Gruzien, C., Raanes, P. N., and Vannitsem, S.: Data assimilation for chaotic dynamics, in: *Data Assimilation for Atmospheric, Oceanic and Hydrologic Applications (Vol. IV)*, edited by P., S. K. and X., L., pp. 1–42, Springer International Publishing, Cham, ISBN 978-3-030-77722-7, [https://doi.org/10.1007/978-3-030-77722-7\\_1](https://doi.org/10.1007/978-3-030-77722-7_1), 2022.
- Daley, R.: *Atmospheric Data Analysis*, Cambridge University Press, New-York, ISBN 9780521458252, 1991.
- Fillion, A., Bocquet, M., Gratton, S., Gürol, S., and Sakov, P.: An iterative ensemble Kalman smoother in presence of additive model error, *SIAM/ASA J. Uncertain. Quantif.*, 8, 198–228, <https://doi.org/10.1137/19M1244147>, 2020.
- Palatella, L., Carrassi, A., and Trevisan, A.: Lyapunov vectors and assimilation in the unstable subspace: theory and applications, *J. Phys. A: Math. Theor.*, 46, 254 020, <https://doi.org/10.1088/1751-8113/46/25/254020>, 2013.
- Raanes, P. N., Stordal, A. S., and Evensen, G.: Revising the stochastic iterative ensemble smoother, *Nonlin. Processes Geophys.*, 26, 325–338, <https://doi.org/10.5194/npg-26-325-2019>, 2019.
- Sakov, P.: On building the state error covariance from a state estimate, <https://doi.org/10.48550/arXiv.2411.14809>, 2025.
- Stordal, A. S., Szklarz, S. P., and Leeuwenburgh, O.: A Theoretical look at Ensemble-Based Optimization in Reservoir Management, *Mathematical Geosciences*, 48, 399–417, <https://doi.org/10.1007/s11004-015-9598-6>, 2016.
